# Supplementary material
Source: PubMed Central journal article supplement (PMC10008616)
Supplement: 41467_2023_36017_MOESM1_ESM.pdf [file 41467_2023_36017_MOESM1_ESM.pdf]

## Supplementary Information

### **Smartphone-based platforms implementing microfluidic detection with image-based artificial intelligence**

Bangfeng Wang<sup>1,3</sup>, Yiwei Li<sup>1,2,3</sup>, Mengfan Zhou<sup>1</sup>, Yulong Han<sup>2</sup>, Mingyu Zhang<sup>1</sup>,  
Zhaolong Gao<sup>1</sup>, Zetai Liu<sup>1</sup>, Peng Chen<sup>1</sup>, Wei Du<sup>1</sup>, Xingcai Zhang<sup>2\*</sup>, Xiaojun Feng<sup>1\*</sup>,  
Bi-Feng Liu<sup>1\*</sup>

<sup>1</sup>*The Key Laboratory for Biomedical Photonics of MOE at Wuhan National Laboratory for Optoelectronics - Hubei Bioinformatics & Molecular Imaging Key Laboratory, Systems Biology Theme, Department of Biomedical Engineering, College of Life Science and Technology, Huazhong University of Science and Technology, Wuhan 430074, China.*

<sup>2</sup>*School of Engineering and Applied Sciences, Harvard University, Cambridge, Massachusetts, 02138, USA.*

<sup>3</sup>These authors contributed equally: Bangfeng Wang, Yiwei Li

\* Corresponding author emails:

xingcai0819@outlook.com (X.Z)

xfeng@mail.hust.edu.cn (X. F.)

bfliu@mail.hust.edu.cn (B. L.)

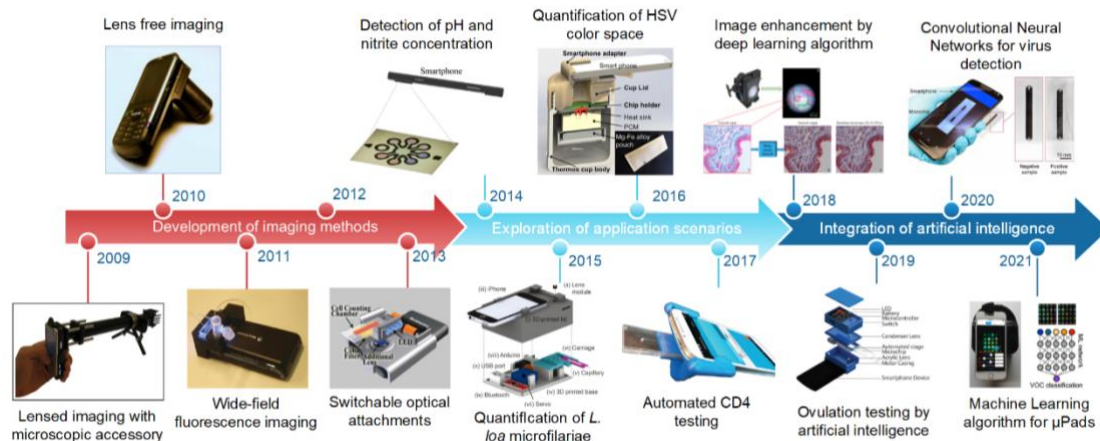

**Supplementary Fig. 1. Timeline for the development of mHealth platforms with representative technological achievements and applications.** HSV denotes Hue, Saturation, Value respectively, and  $\mu$ PADs denotes microfluidic paper-based analytical devices. (figures adapted with permission from ref. 1-12 ).

| Imaging modalities                           | Advantages                                                                                       | Disadvantages                                                                                                                      | Resolution        | FOV                            |
|----------------------------------------------|--------------------------------------------------------------------------------------------------|------------------------------------------------------------------------------------------------------------------------------------|-------------------|--------------------------------|
| Lens-free imaging<br>2,13-24                 | Compact hardware structure suitable for mHealth platforms                                        | Replacement of the smartphone camera;<br>Requiring image reconstruction for clear results                                          | 0.5 ~ 2 $\mu$ m   | 4.04 ~ 23.8 mm <sup>2</sup>    |
| Bright field lens-based imaging<br>1,5,25-32 | Direct morphological observation of tiny objects followed by analysis with algorithm such as CNN | Trade-off between resolution and FOV;<br>Distortion around the edges of the images due to the curved nature of the spherical lens. | 1.2 ~ 6.5 $\mu$ m | 0.0225 ~ 12.64 mm <sup>2</sup> |
| Fluorescence imaging<br>3,12,27,33-39        | Relatively high specificity and large FOV                                                        | Pretreatment of samples;<br>Unable to observe the morphological structure of tiny objects                                          | 1.7 ~ 20 $\mu$ m  | 0.5 ~ 81 mm <sup>2</sup>       |

**Supplementary Table 1.** Comparison of smartphone-based imaging modalities.

| Machine intelligence                   | Algorithms                                                                                                                                                 | Tasks                                                                       | Advantages                                                                                     | Disadvantages                                                                             |
|----------------------------------------|------------------------------------------------------------------------------------------------------------------------------------------------------------|-----------------------------------------------------------------------------|------------------------------------------------------------------------------------------------|-------------------------------------------------------------------------------------------|
| General image processing algorithm     | Counting algorithm;<br>Lens-free image reconstruction algorithm; Colorimetric algorithm; Locating algorithm;<br>Fluorescence intensity detection algorithm | Enhancement;<br>Reconstruction;<br>Denoising;<br>Locating;<br>Colorimetry   | Simple and convenient;<br>Low computing power requirements; Minimal data training requirements | Low robustness; Low accuracy under non-specific conditions                                |
| Traditional machine learning algorithm | Least-Squares SVM;<br>Random Forest;<br>Bootstrap aggregating                                                                                              | Classification;<br>Denoising                                                | Interpretable; Low data volume requirements                                                    | Manual feature extraction; Low accuracy in comparison to deep learning                    |
| Deep learning algorithm                | CNN (MobileNet, U-Net, Inception, Xception, ResNet);<br>GAN                                                                                                | Classification;<br>Segmentation;<br>Regression;<br>Enhancement;<br>Locating | Relatively high accuracy;<br>Automatic feature extraction                                      | Large data volume requirements; Large computing power requirements; Weak interpretability |

**Supplementary Table 2.** Comparison of different types of algorithms in mHealth platforms.

| Imaging modalities                           | Device components                                                                                                                                   | Algorithms                                                                                                                                               | Applications                                                                                                                                        |
|----------------------------------------------|-----------------------------------------------------------------------------------------------------------------------------------------------------|----------------------------------------------------------------------------------------------------------------------------------------------------------|-----------------------------------------------------------------------------------------------------------------------------------------------------|
| Lens-free imaging<br>2,13–24                 | CMOS <sup>2,13,17</sup> ; LED <sup>2,13,17</sup>                                                                                                    | Holographic reconstruction algorithm <sup>2</sup> ; Pixel super-resolution algorithm <sup>13</sup> ; Counting algorithm <sup>17</sup>                    | Cell counting <sup>2,13</sup> ; Parasite detection <sup>2,13</sup> ; Virus detection <sup>17</sup>                                                  |
| Bright field lens-based imaging<br>1,5,25–32 | External lens <sup>1,3,9,26,40</sup> ; Motors <sup>5,9,41</sup> ; LED <sup>1,5,9,26,40</sup> ; Pump <sup>42–45</sup> ; Diffuser; MCU <sup>5,9</sup> | MobileNet <sup>9</sup> ; U-Net <sup>40</sup> ; Inception <sup>10,46,47</sup> ; Xception <sup>48,49</sup> ; ResNet <sup>50</sup>                          | Cell counting <sup>7,51</sup> ; Parasite detection <sup>52–56</sup> ; Ovulation detection <sup>9</sup> ; Sickle-cell anemia diagnosis <sup>40</sup> |
| Fluorescence imaging <sup>12,27,33–39</sup>  | External lens; Filters; LED; Heat sink; Laser module; Dichroic mirror                                                                               | Bootstrap aggregating <sup>57,58</sup> ; SVM <sup>46,58,59</sup> ; KNN <sup>59</sup> ; Random forest <sup>59,60</sup> ; Counting algorithm <sup>57</sup> | Cell counting <sup>12,33,40</sup> ; Parasite detection <sup>34,57</sup> ; Virus detection <sup>61</sup> ; Protein detection <sup>27</sup>           |

**Supplementary Table 3.** Linkages of imaging modalities, device components, algorithms, and applications.

## References

1. Breslauer, D. N., Maamari, R. N., Switz, N. A., Lam, W. A. & Fletcher, D. A. Mobile phone based clinical microscopy for global health applications. *PLoS One* **4**, 1–7 (2009).
2. Tseng, D. *et al.* Lensfree microscopy on a cellphone. *Lab Chip* **10**, 1787–1792 (2010).
3. Zhu, H. *et al.* Cost-effective and rapid blood analysis on a cell-phone. *Lab Chip* **13**, 1282–1288 (2013).
4. Lopez-Ruiz, N. *et al.* Smartphone-based simultaneous pH and nitrite colorimetric determination for paper microfluidic devices. *Anal. Chem.* **86**, 9554–9562 (2014).
5. D’Ambrosio, M. V. *et al.* Point-of-care quantification of blood-borne filarial parasites with a mobile phone microscope. *Sci. Transl. Med.* **7**, 286re4 (2015).
6. Liao, S. C. *et al.* Smart cup: A minimally-instrumented, smartphone-based point-of-care molecular diagnostic device. *Sens. Actuators, B Chem.* **229**, 232–238 (2016).
7. Kanakasabapathy, M. K. *et al.* Rapid, label-free CD4 testing using a smartphone compatible device. *Lab Chip* **17**, 2910–2919 (2017).
8. Rivenson, Y. *et al.* Deep learning enhanced mobile-phone microscopy. *ACS Photonics* **5**, 2354–2364 (2018).
9. Potluri, V. *et al.* An inexpensive smartphone-based device for point-of-care ovulation testing. *Lab Chip* **19**, 59–67 (2019).
10. Draz, M. S. *et al.* Virus detection using nanoparticles and deep neural network-enabled smartphone system. *Sci. Adv.* **6**, 1–13 (2020).
11. Kim, H. *et al.* Kaleidoscopic fluorescent arrays for machine-learning-based point-of-care chemical sensing. *Sens. Actuators, B Chem.* **329**, 129248 (2021).
12. Zhu, H., Mavandadi, S., Coskun, A. F., Yaglidere, O. & Ozcan, A. Optofluidic fluorescent imaging cytometry on a cell phone. *Anal. Chem.* **83**, 6641–6647 (2011).

13. Lee, S. A. & Yang, C. A smartphone-based chip-scale microscope using ambient illumination. *Lab Chip* **14**, 3056–3063 (2014).
14. Mudanyali, O., Oztoprak, C., Tseng, D., Erlinger, A. & Ozcan, A. Detection of waterborne parasites using field-portable and cost-effective lensfree microscopy. *Lab Chip* **10**, 2419–2423 (2010).
15. Khademhosseini, B., Biener, G., Sencan, I. & Ozcan, A. Lensless on-chip color imaging using nano-structured surfaces and compressive decoding. *Opt. InfoBase Conf. Pap.* 2–3 (2011).
16. Oh, C., Isikman, S. O., Khademhosseini, B. & Ozcan, A. On-chip differential interference contrast microscopy using lensless digital holography. *Opt. Express* **18**, 4717 (2010).
17. Im, H. *et al.* Digital diffraction analysis enables low-cost molecular diagnostics on a smartphone. *Proc. Natl. Acad. Sci. U. S. A.* **112**, 5613–5618 (2015).
18. Nguyen, H. Q., Bui, H. K., Phan, V. M. & Seo, T. S. An internet of things-based point-of-care device for direct reverse-transcription-loop mediated isothermal amplification to identify SARS-CoV-2. *Biosens. Bioelectron.* **195**, 0956–5663 (2022).
19. Mudanyali, O. *et al.* Compact, light-weight and cost-effective microscope based on lensless incoherent holography for telemedicine applications. *Lab Chip* **10**, 1417–1428 (2010).
20. Zheng, G., Lee, S. A., Yang, S. & Yang, C. Sub-pixel resolving optofluidic microscope for on-chip cell imaging. *Lab Chip* **10**, 3125–3129 (2010).
21. Bishara, W. *et al.* Holographic pixel super-resolution in portable lensless on-chip microscopy using a fiber-optic array. *Lab Chip* **11**, 1276–1279 (2011).
22. Ozcan, A. & McLeod, E. Lensless Imaging and Sensing. *Annu. Rev. Biomed. Eng.* **18**, 77–102 (2016).
23. Isikman, S. O. *et al.* Lensfree computational microscopy tools for cell and tissue imaging at the point-of-care and in low-resource settings. *Anal. Cell. Pathol.* **35**, 229–247 (2012).

24. Stybayeva, G. *et al.* Lensfree holographic imaging of antibody microarrays for high-throughput detection of leukocyte numbers and function. *Anal. Chem.* **82**, 3736–3744 (2010).
25. Smith, Z. J. *et al.* Cell-phone-based platform for biomedical device development and education applications. *PLoS One* **6**, e17150 (2011).
26. Switz, N. A., D’Ambrosio, M. V. & Fletcher, D. A. Low-cost mobile phone microscopy with a reversed mobile phone camera lens. *PLoS One* **9**, e95330 (2014).
27. Joh, D. Y. *et al.* Cellphone enabled point-of-care assessment of breast tumor cytology and molecular HER2 expression from fine-needle aspirates. *npj Breast Cancer* **7**, 126 (2021).
28. Wicks, L. C. *et al.* EnLightenment: High resolution smartphone microscopy as an educational and public engagement platform. *Wellcome Open Res.* **2**, 1–18 (2017).
29. Sung, Y.-L., Jeang, J., Lee, C.-H. & Shih, W.-C. Fabricating optical lenses by inkjet printing and heat-assisted in situ curing of polydimethylsiloxane for smartphone microscopy. *J. Biomed. Opt.* **20**, 047005 (2015).
30. Rabha, D., Sarmah, A. & Nath, P. Design of a 3D printed smartphone microscopic system with enhanced imaging ability for biomedical applications. *J. Microsc.* **276**, 13–20 (2019).
31. Surveillance, M., Bornhorst, J., Nustede, E. J. & Fudickar, S. Mass surveillance of *C. elegans*—smartphone-based DIY microscope and machine-learning-based approach for worm detection. *Sensors* **19**, 1468 (2019).
32. Hergemöller, T. & Laumann, D. Smartphone Magnification Attachment: Microscope or Magnifying Glass. *Phys. Teach.* **55**, 361–364 (2017).
33. Zhu, H., Yaglidere, O., Su, T. W., Tseng, D. & Ozcan, A. Cost-effective and compact wide-field fluorescent imaging on a cell-phone. *Lab Chip* **11**, 315–322 (2011).

34. Snow, J. W. *et al.* Rapid imaging, detection, and quantification of *Nosema ceranae* spores in honey bees using mobile phone-based fluorescence microscopy. *Lab Chip* **19**, 789–797 (2019).
35. Orth, A., Wilson, E. R., Thompson, J. G. & Gibson, B. C. A dual-mode mobile phone microscope using the onboard camera flash and ambient light. *Sci. Rep.* **8**, 1–8 (2018).
36. Kheireddine, S., Sudalaiyadum Perumal, A., Smith, Z. J., Nicolau, D. V. & Wachsmann-Hogiu, S. Dual-phone illumination-imaging system for high resolution and large field of view multi-modal microscopy. *Lab Chip* **19**, 825–836 (2019).
37. Rabha, D., Biswas, S., Chamuah, N., Mandal, M. & Nath, P. Wide-field multi-modal microscopic imaging using smartphone. *Opt. Lasers Eng.* **137**, 106343 (2021).
38. Rabha, D., Rather, M. A., Mandal, M. & Nath, P. Programmable illumination smartphone microscopy (PISM): A multimodal imaging platform for biomedical applications. *Opt. Lasers Eng.* **151**, 106931 (2022).
39. Rabha, D. *et al.* An affordable, handheld multimodal microscopic system with onboard cell morphology and counting features on a mobile device. *Analyst* **147**, 2859–2869 (2022).
40. de Haan, K. *et al.* Automated screening of sickle cells using a smartphone-based microscope and deep learning. *npj Digit. Med.* **3**, 76 (2020).
41. Park, Y. M., Kim, C. H., Lee, S. J. & Lee, M. K. Multifunctional hand-held sensor using electronic components embedded in smartphones for quick PCR screening. *Biosens. Bioelectron.* **141**, 111415 (2019).
42. Laksanasopin, T. *et al.* A smartphone dongle for diagnosis of infectious diseases at the point of care. *Sci. Transl. Med.* **7**, 273re1 (2015).
43. Comina, G., Suska, A. & Filippini, D. A 3D printed device for quantitative enzymatic detection using cell phones. *Anal. Methods* **8**, 6135–6142 (2016).
44. Suska, A. & Filippini, D. Autonomous lab-on-a-chip generic architecture for disposables with integrated actuation. *Sci. Rep.* **9**, 1–9 (2019).



45. Comina, G., Suska, A. & Filippini, D. Towards autonomous lab-on-a-chip devices for cell phone biosensing. *Biosens. Bioelectron.* **77**, 1153–1167 (2016).
46. Sunny, S. *et al.* A smart tele-cytology point-of-care platform for oral cancer screening. *PLoS One* **14**, 1–16 (2019).
47. Gunda, N. S. K., Gautam, S. H. & Mitra, S. K. Artificial Intelligence Based Mobile Application for Water Quality Monitoring. *J. Electrochem. Soc.* **166**, B3031–B3035 (2019).
48. Kanakasabapathy, M. K. *et al.* Development and evaluation of inexpensive automated deep learning-based imaging systems for embryology. *Lab Chip* **19**, 4139–4145 (2019).
49. Shokr, A. *et al.* Mobile health (mHealth) viral diagnostics enabled with adaptive adversarial learning. *ACS Nano* **15**, 665–673 (2020).
50. Kanakasabapathy, M. K. *et al.* Adaptive adversarial neural networks for the analysis of lossy and domain-shifted datasets of medical images. *Nat. Biomed. Eng.* **5**, 571–585 (2021).
51. Zeng, Y. *et al.* A low cost and portable smartphone microscopic device for cell counting. *Sens. Actuators, A Phys.* **274**, 57–63 (2018).
52. Bogoch, I. I. *et al.* Evaluation of a mobile phone-based microscope for screening of *Schistosoma haematobium* infection in rural Ghana. *Am. J. Trop. Med. Hyg.* **96**, 1468–1471 (2017).
53. Saeed, M. A. & Jabbar, A. “Smart diagnosis” of parasitic diseases by use of smartphones. *J Clin Microbiol* **56**, e01469-17 (2018).
54. Pirnstill, C. W. & Coté, G. L. Malaria diagnosis using a mobile phone polarized microscope. *Sci. Rep.* **5**, 1–13 (2015).
55. Shrestha, R. *et al.* A smartphone microscopic method for simultaneous detection of (Oo)cysts of cryptosporidium and giardia. *PLoS Negl. Trop. Dis.* **14**, 1–19 (2020).
56. Coulibaly, J. T. *et al.* Accuracy of mobile phone and handheld light microscopy for the diagnosis of schistosomiasis and intestinal protozoa infections in Côte d’Ivoire. *PLoS Negl. Trop. Dis.* **10**, 1–10 (2016).

57. Koydemir, H. C. *et al.* Rapid imaging, detection and quantification of *Giardia lamblia* cysts using mobile-phone based fluorescent microscopy and machine learning. *Lab Chip* **15**, 1284–1293 (2015).
58. Koydemir, H. C. *et al.* Comparison of supervised machine learning algorithms for waterborne pathogen detection using mobile phone fluorescence microscopy. *Nanophotonics* **6**, 731–741 (2017).
59. Solmaz, M. E. *et al.* Quantifying colorimetric tests using a smartphone app based on machine learning classifiers. *Sens. Actuators, B Chem.* **255**, 1967–1973 (2018).
60. Kühnemund, M. *et al.* Targeted DNA sequencing and in situ mutation analysis using mobile phone microscopy. *Nat. Commun.* **8**, 1–8 (2017).
61. Samacoits, A. *et al.* Machine learning-driven and smartphone-based fluorescence detection for CRISPR diagnostic of SARS-CoV-2. *ACS Omega* **6**, 2727–2733 (2021).
